# Supplementary material for: Soy yoghurts produced with efficient GABA (γ-aminobutyric acid)-producing Lactiplantibacillus plantarum ameliorate hyperglycaemia and re-establish gut microbiota in streptozotocin (STZ)-induced diabetic mice
Source: Royal Society of Chemistry journal article supplement (doi:10.1039/d2fo02708a), 2023-01-01
Supplement: d2fo02708a1.pdf [file d2fo02708a1.pdf]

# Supplement

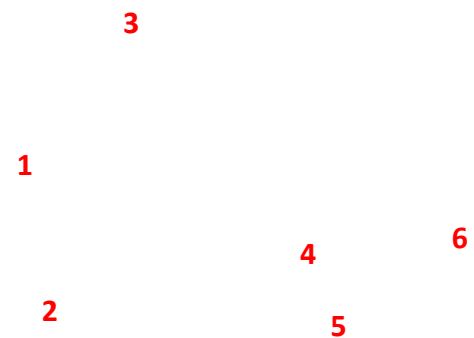

## Soymilk

- 1 Daidzin
- 2 Glycitin
- 3 Genistin
- 4 Daidzein
- 5 Glycitein
- 6 Genistein

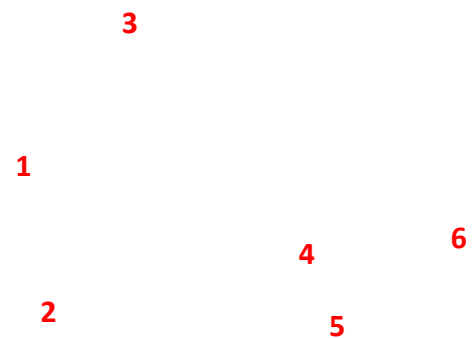

## Soy yogurt

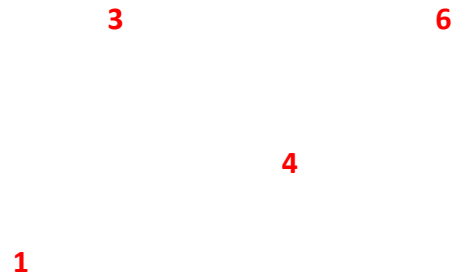

## Plasma of mouse fed soy yogurt

HPLC condition :  
LiChrospher 100 RP-18e (4 x 250 mm, 5µm)  
Mobile phase : 0.05 % TFA:CH<sub>3</sub>CN (95:5→40:60)  
Flow rate : 1.0 ml/min  
Detection : 254 nm
